# Supplementary material for: Integration of G-Quadruplex and Pyrene as a Simple and Efficient Ratiometric Fluorescent Platform That Programmed by Contrary Logic Pair for Highly Sensitive and Selective Coralyne (COR) Detection
Source: MDPI journal article supplement (doi:10.3390/bios13040489), 2023-04-19
Supplement: s1 [file s1]

## Supporting Information

**Integration of G-Quadruplex and Pyrene as a Simple and Efficient Ratiometric Fluorescent Platform that Programmed by Contrary Logic Pair for Highly Sensitive and Selective Coralyne (COR) Detection**

**Jiawen Han <sup>1</sup>, Yaru Ding <sup>2</sup>, Xujuan Lv <sup>1</sup>, Yuwei Zhang <sup>1</sup> and Daoqing Fan <sup>1,3,\*</sup>**

<sup>1</sup> Laboratory for Marine Drugs and Bioproducts, National Laboratory for Marine Science and Technology, Key Laboratory of Marine Drugs, Ministry of Education, School of Medicine and Pharmacy, Ocean University of China, Qingdao 266003, China

<sup>2</sup> School of Pharmaceutical Sciences, Xiamen University, Xiamen 361102, China

<sup>3</sup> State Key Laboratory of Electroanalytical Chemistry, Changchun Institute of Applied Chemistry, Chinese Academy of Sciences, Changchun 130022, China

\* Correspondence: fdq9688@ouc.edu.cn or dqfan93@163.com

## TABLE OF CONTENT

|                                |           |
|--------------------------------|-----------|
| <b>Experiment section.....</b> | <b>3</b>  |
| <b>Table S1.....</b>           | <b>4</b>  |
| <b>Figure S1.....</b>          | <b>5</b>  |
| <b>Figure S2.....</b>          | <b>6</b>  |
| <b>Figure S3.....</b>          | <b>7</b>  |
| <b>Figure S4.....</b>          | <b>8</b>  |
| <b>Figure S5.....</b>          | <b>9</b>  |
| <b>Figure S6.....</b>          | <b>10</b> |
| <b>Figure S7.....</b>          | <b>11</b> |
| <b>Figure S8.....</b>          | <b>12</b> |
| <b>Figure S9.....</b>          | <b>13</b> |
| <b>Figure S10.....</b>         | <b>14</b> |

## Experiment Section

### Colorimetric experiments

Colorimetric experiments of TMB catalyzed by A-COR-A G4zyme were performed as follows:  $1 \times$  HEPES buffer (25 mM HEPES, 10 mM NaCl, 0.05 % (w/v) TritonX-100, 1% (v/v) DMSO, pH 7.4) and  $1 \times$  MES-HAc buffer (25 mM MES, 10 mM KAc, pH 4.5) were used in colorimetric experiments. 500 nM DNA and the suitable concentration of COR were incubated in  $1 \times$  HEPES buffer for 30 min, then, 500 nM hemin was added. The above mixture was reacted at room temperature for 1 h to form A-COR-A G4zyme. After that, 20  $\mu$ L G4zyme solution was used in TMB-H<sub>2</sub>O<sub>2</sub> reaction system. 5  $\mu$ L TMB (0.5 % (w/v)), 5  $\mu$ L H<sub>2</sub>O<sub>2</sub> (30 %) and  $1 \times$  MES-HAc buffer were successively added at last to make a total volume of 500  $\mu$ L. After 5 min, 5  $\mu$ L H<sub>2</sub>SO<sub>4</sub> was added to terminating the reaction. Finally, UV-vis absorption spectra were recorded on a Shimadzu UV-2600i spectrophotometer.

**Table S1.** DNA sequences used in the work.

| Strand      | Sequence (5' to 3')                |
|-------------|------------------------------------|
| Py-A10-G3   | Py-AAAAAAAAAAGGGTAGGGCGGG          |
| G1-A10-Py   | TGGGTAAAAAAAAA-Py                  |
| G1-A10-FAM  | TGGGTAAAAAAAAA-6-FAM               |
| BHQ1-A10-G3 | BHQ1-AAAAAAAAAAGGGTAGGGCGGG        |
| G1-A10      | TGGGTAAAAAAAAA                     |
| A10-G3      | AAAAAAAAAAGGGTAGGGCGGG             |
| G1-A15      | TGGGTAAAAAAAAAAAAA                 |
| A15-G3      | AAAAAAAAAAAAAAGGGTAGGGCGGG         |
| G1-A20      | TGGGTAAAAAAAAAAAAAAAAA             |
| A20-G3      | AAAAAAAAAAAAAAAAAAAAAAGGGTAGGGCGGG |
| G1-A30      | TGGGTAAAAAAAAAAAAAAAAAAAAAAAAA     |
| A30-G3      | AAAAAAAAAAAAAAAAAAAAAAGGGTAGGGCGGG |
| G1-A40      | TGGGTAAAAAAAAAAAAAAAAAAAAAAAAAAAAA |
| A40-G3      | AAAAAAAAAAAAAAAAAAAAAAGGGTAGGGCGGG |
| G1-T10      | TGGGTTTTTTTTTT-Py                  |
| T10-G3      | Py-TTTTTTTTTTGGGTAGGGCGGG          |

**Figure S1**

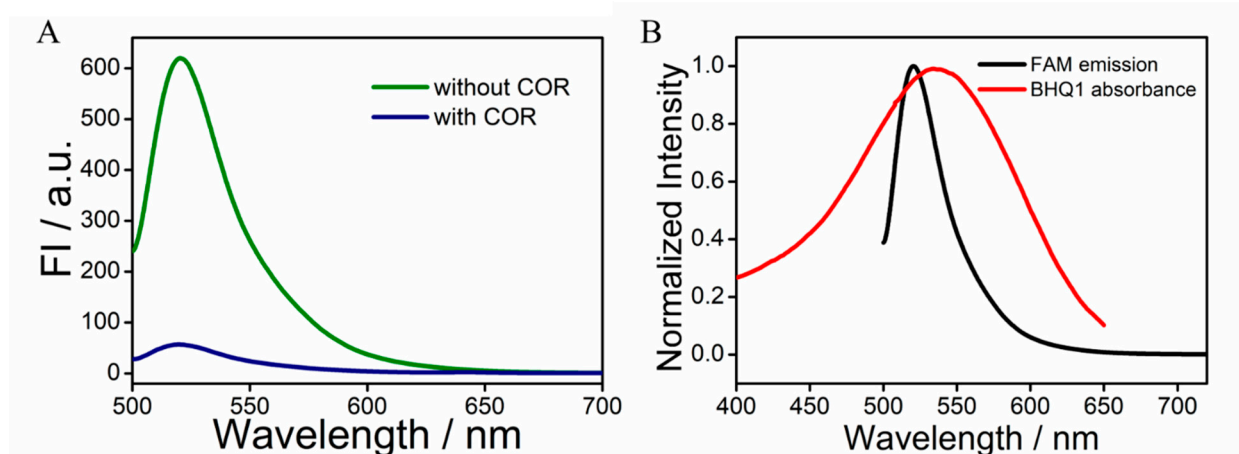

**Figure S1.** (A) Fluorescence spectra of FAM in the absence and presence of COR; (B) UV-vis spectra of BHQ1 (red line) and fluorescence spectra (black line) of FAM.

**Figure S2**

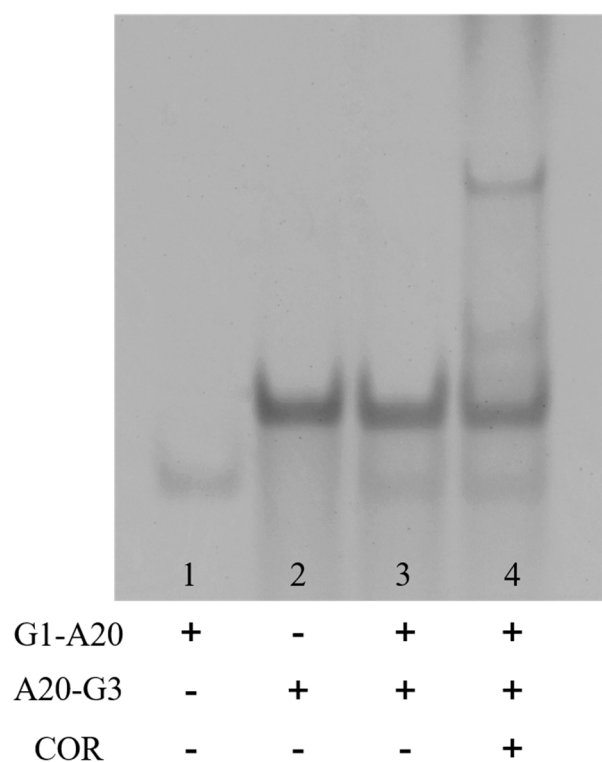

**Figure S2.** PAGE characterization of A-COR-A interaction. Lane 1 to 4 corresponds to G1-A20, A20-G3, G1-A20+A20-G3, G1-A20+A20-G3+COR, respectively. The concentrations of G1-A20, A20-G3 and COR are 20  $\mu$ M, 5  $\mu$ M, 10  $\mu$ M, respectively. The electrophoresis experiments were conducted in 15% native polyacrylamide gel at the voltage of 80 V.

**Figure S3**

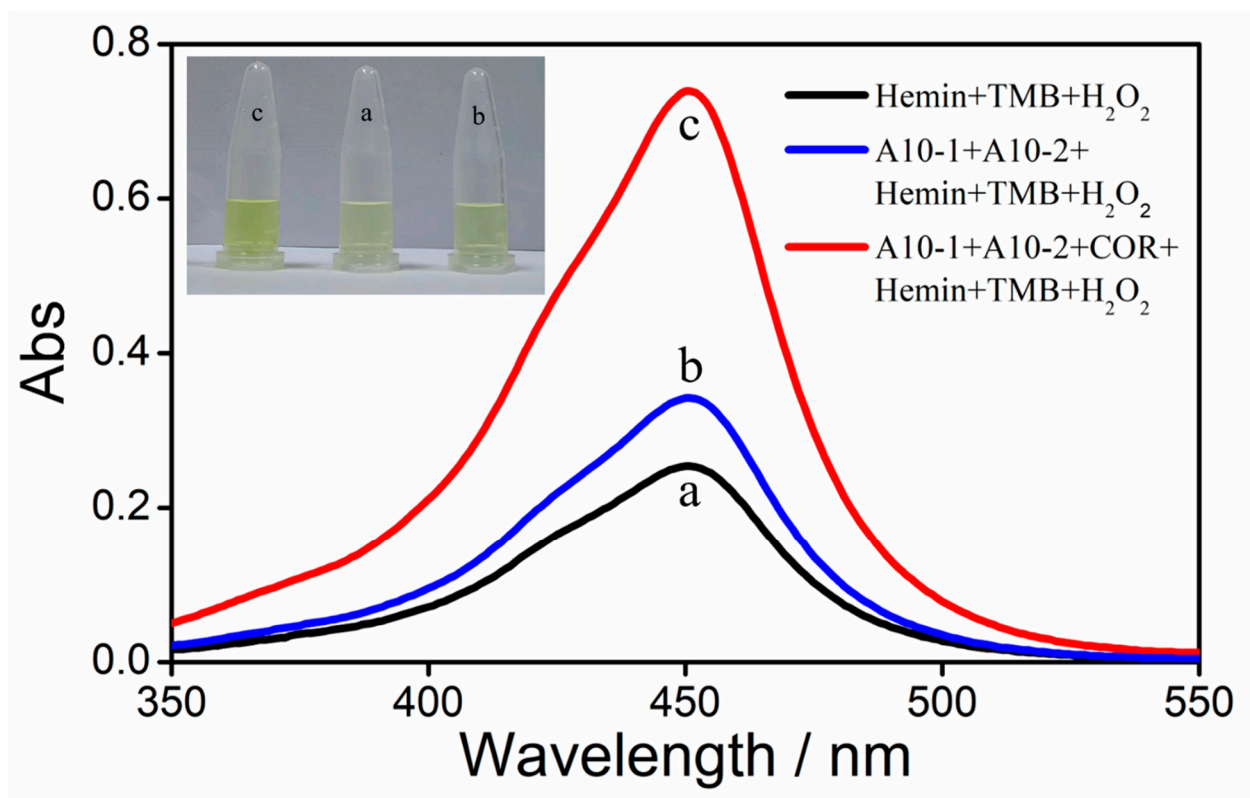

**Figure S3.** UV-vis absorption spectra of the TMB-H<sub>2</sub>O<sub>2</sub> reaction system. (a) Hemin+TMB+H<sub>2</sub>O<sub>2</sub>; (b) A10-1+A10-2+Hemin+TMB+H<sub>2</sub>O<sub>2</sub>; (c) A10-1+A10-2+COR+Hemin+TMB+H<sub>2</sub>O<sub>2</sub>.

**Figure S4**

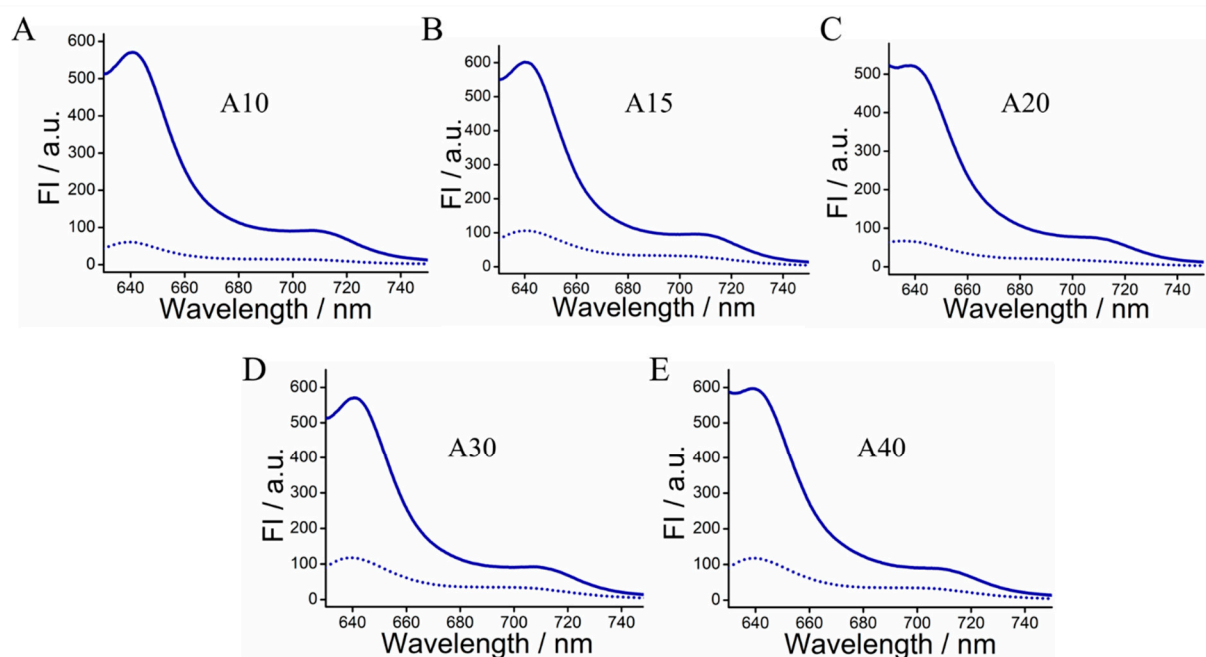

**Figure S4.** Fluorescence spectra of PPIX corresponding to the optimization experiment of poly-A's length in the absence (dotted lines) and presence (solid lines) of COR. (A) A10; (B) A15; (C) A20; (D) A30; (E) A40. The concentrations of PPIX and COR in this experiment are 1.5  $\mu\text{M}$  and 5  $\mu\text{M}$ , respectively.



**Figure S5**

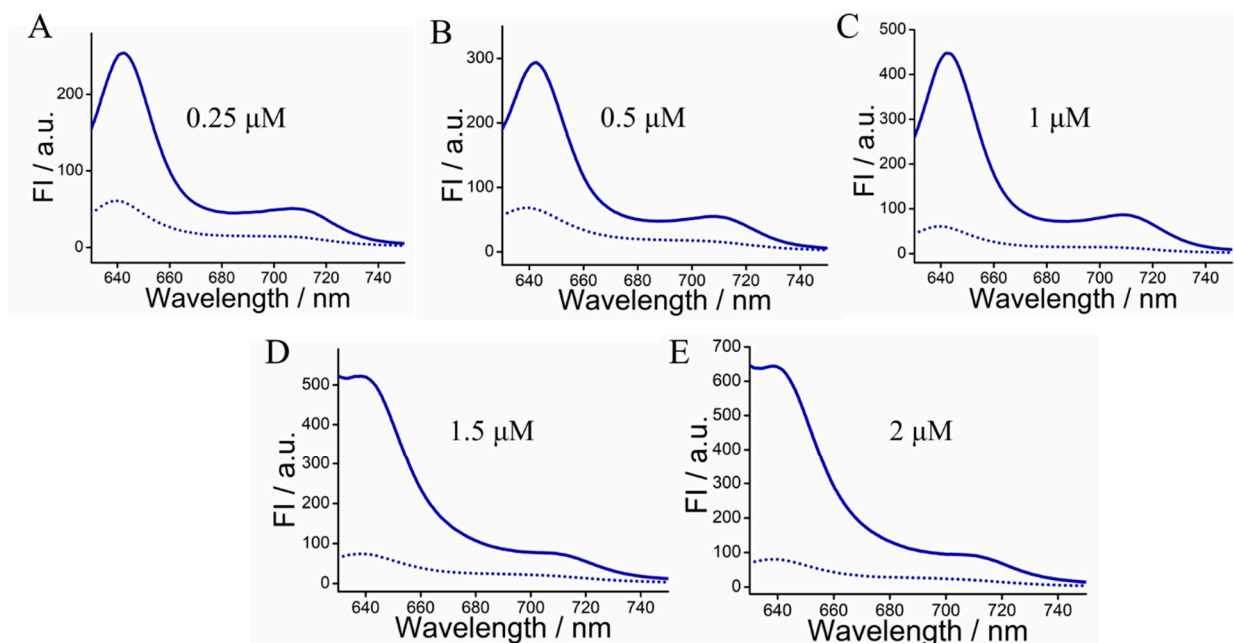

**Figure S5.** Fluorescence spectra of PPIX corresponding to the optimization experiment of PPIX's concentration in the absence (dotted lines) and presence (solid lines) of COR. (A) 0.25  $\mu\text{M}$ ; (B) 0.5  $\mu\text{M}$ ; (C) 1  $\mu\text{M}$ ; (D) 1.5  $\mu\text{M}$ ; (E) 2  $\mu\text{M}$ . The concentration of COR in this experiment is 5  $\mu\text{M}$  and the poly-A strands are two A10s, respectively.

**Figure S6**

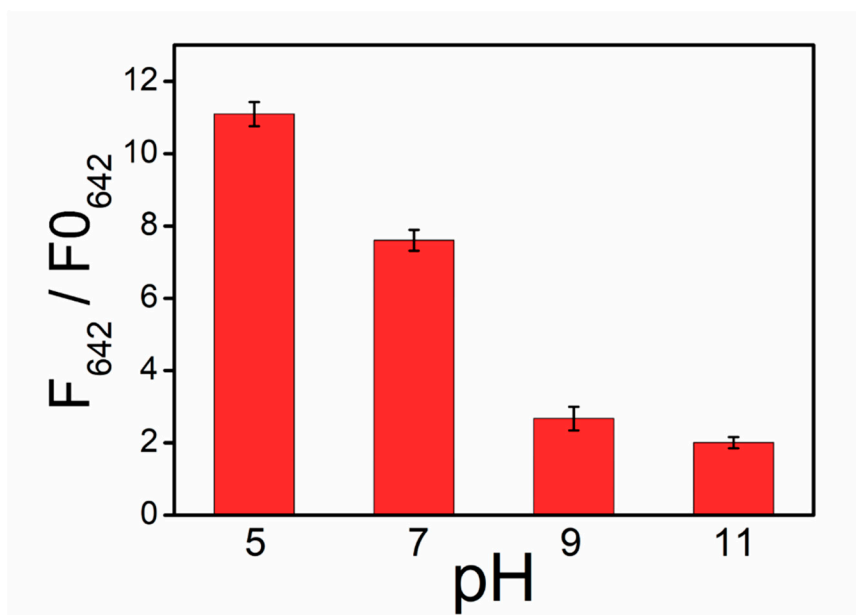

**Figure S6.** Optimization of the pH. The concentrations of PPIX and COR in this experiment are 1  $\mu$ M and 5  $\mu$ M, respectively. The poly-A strands are two A10s, respectively. The error bars are obtained via three independent experiments.

**Figure S7**

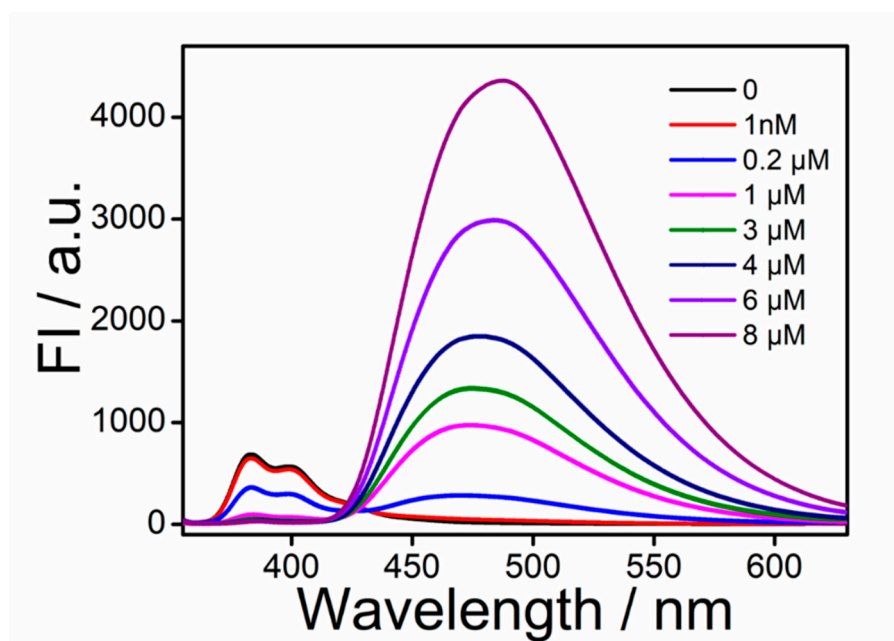

**Figure S7.** The complete fluorescence spectra of Py with increasing concentrations of COR.

**Figure S8**

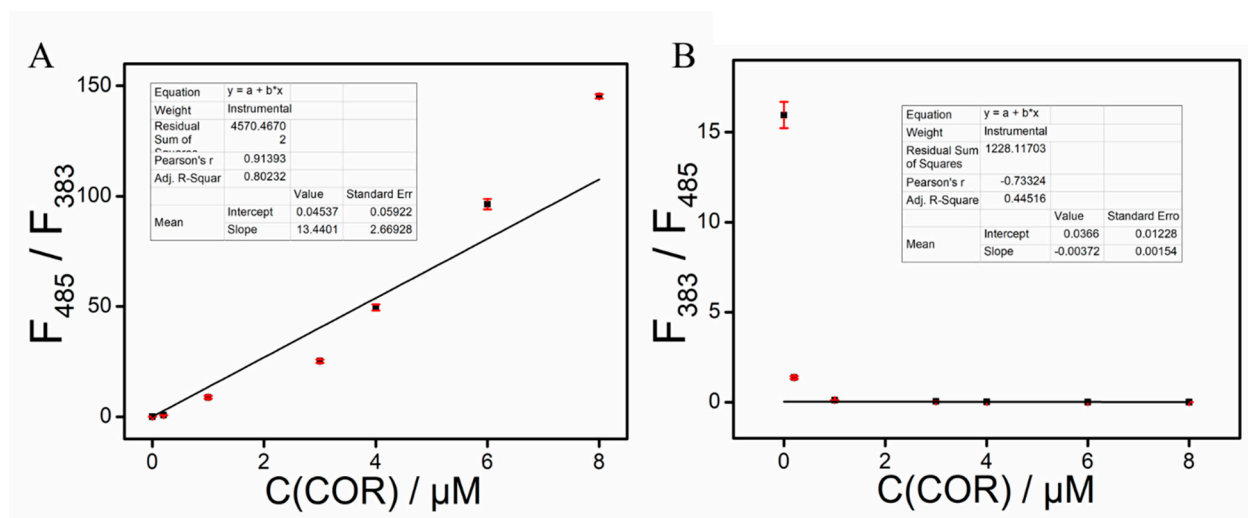

**Figure S8.** The relevant calibration curves between (A)  $F_{485}/F_{383}$  and (B)  $F_{383}/F_{485}$  as a function of various concentrations of COR. The error bars are obtained via three independent experiments.

**Figure S9**

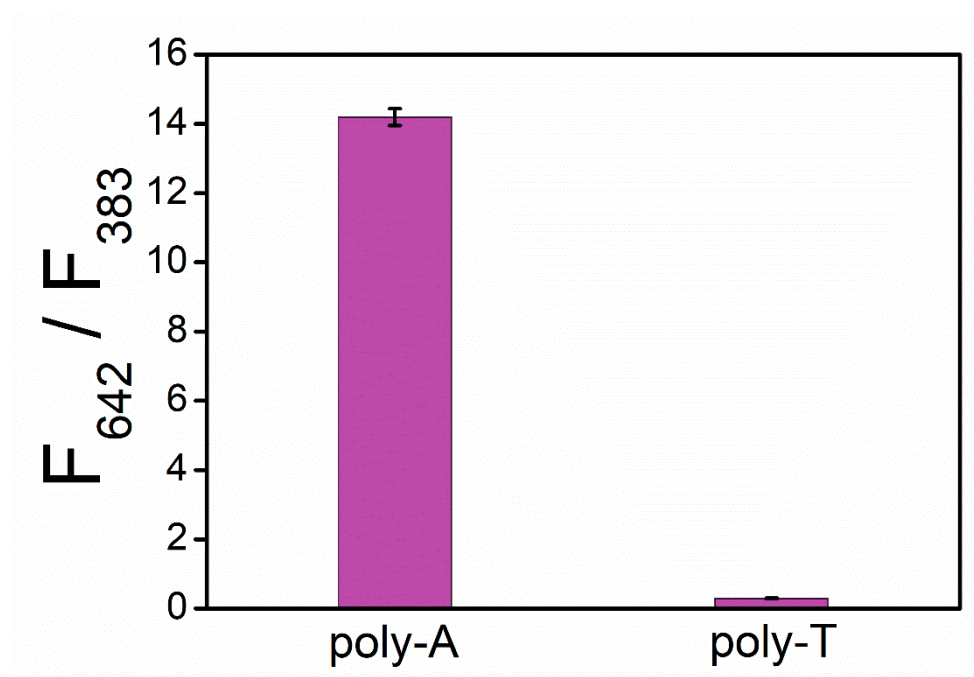

**Figure S9.** Ratiometric fluorescent columns with error bars in the presence of poly-A and poly-T for this system.

**Figure S10**

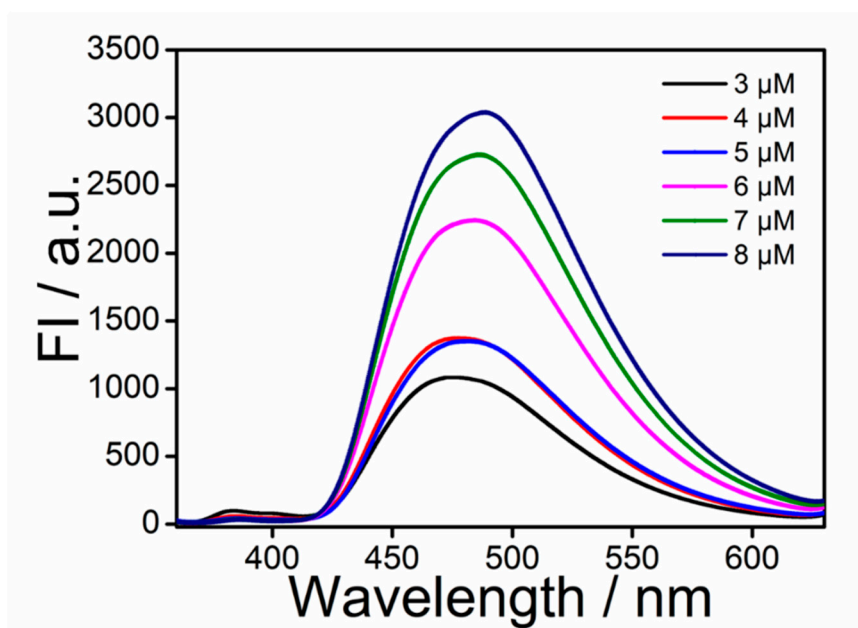

**Figure S10.** The complete fluorescence spectra of Py in real sample application.
